# Supplementary material for: Phototransformation of benzimidazole and thiabendazole inside cucurbit[8]uril
Source: Royal Society of Chemistry journal article supplement (doi:10.1039/c3pp50336d), 2013-11-02
Supplement: c3pp50336d.pdf [file c3pp50336d.pdf]

## Supporting Information

### Phototransformation of benzimidazole and thiabendazole inside cucurbit[8]uril

Jaroslav Smitka, Américo Lemos, Mintu Porel, Steffen Jockusch, Tomás R. Beldarrain, Eva Tesařová, and José P. Da Silva

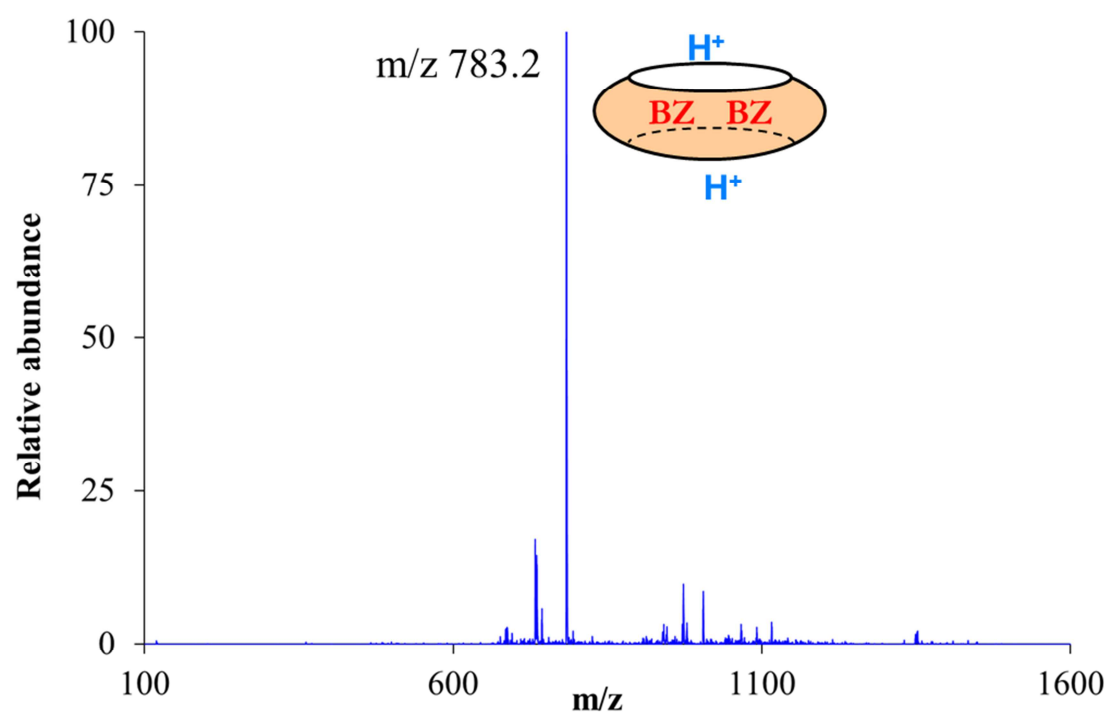

Figure S1. ESI-MS spectrum (full scan) of an aqueous solution of BZ and CB8 (1:1, stoichiometry) at pH ~ 6.5, 25  $\mu$ M) Assignment: 783.2  $[CB8+2BZ+2H]^{2+}$ .

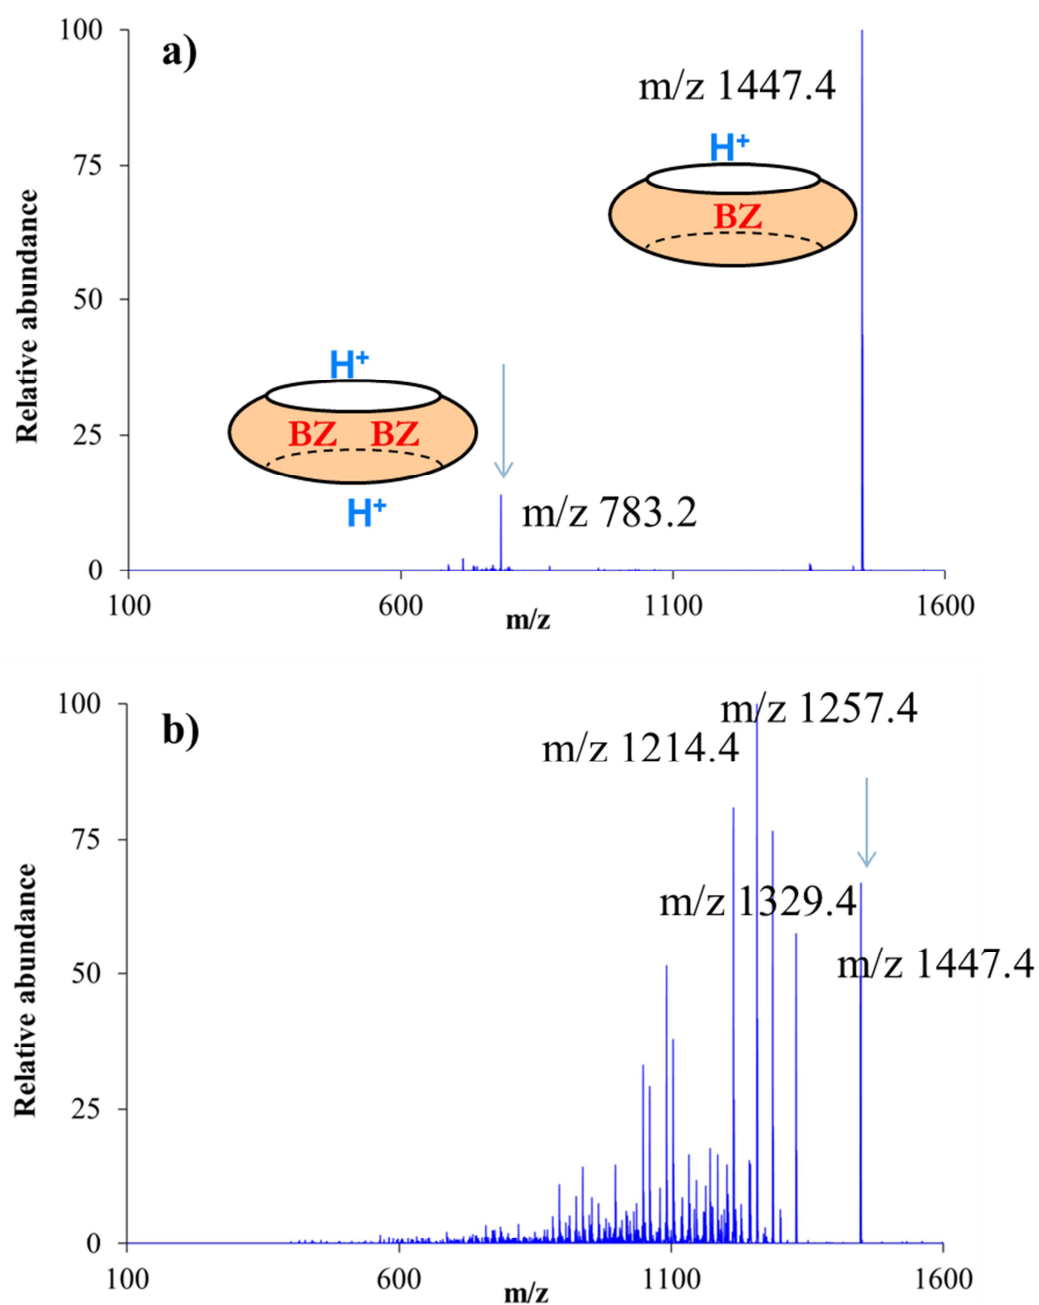

Figure S2. Fragmentation spectra of the ion at m/z 783.2. **a)** MS<sup>2</sup>(783.2); **b)** MS<sup>3</sup>(783.2→1447.4). Assignments: 783.2 [CB8+2BZ+2H]<sup>2+</sup>; 1447.4 [CB8+BZ+H]<sup>+</sup>; 1329.4 [CB8+]<sup>+</sup>. The arrows indicate the fragmented peaks.

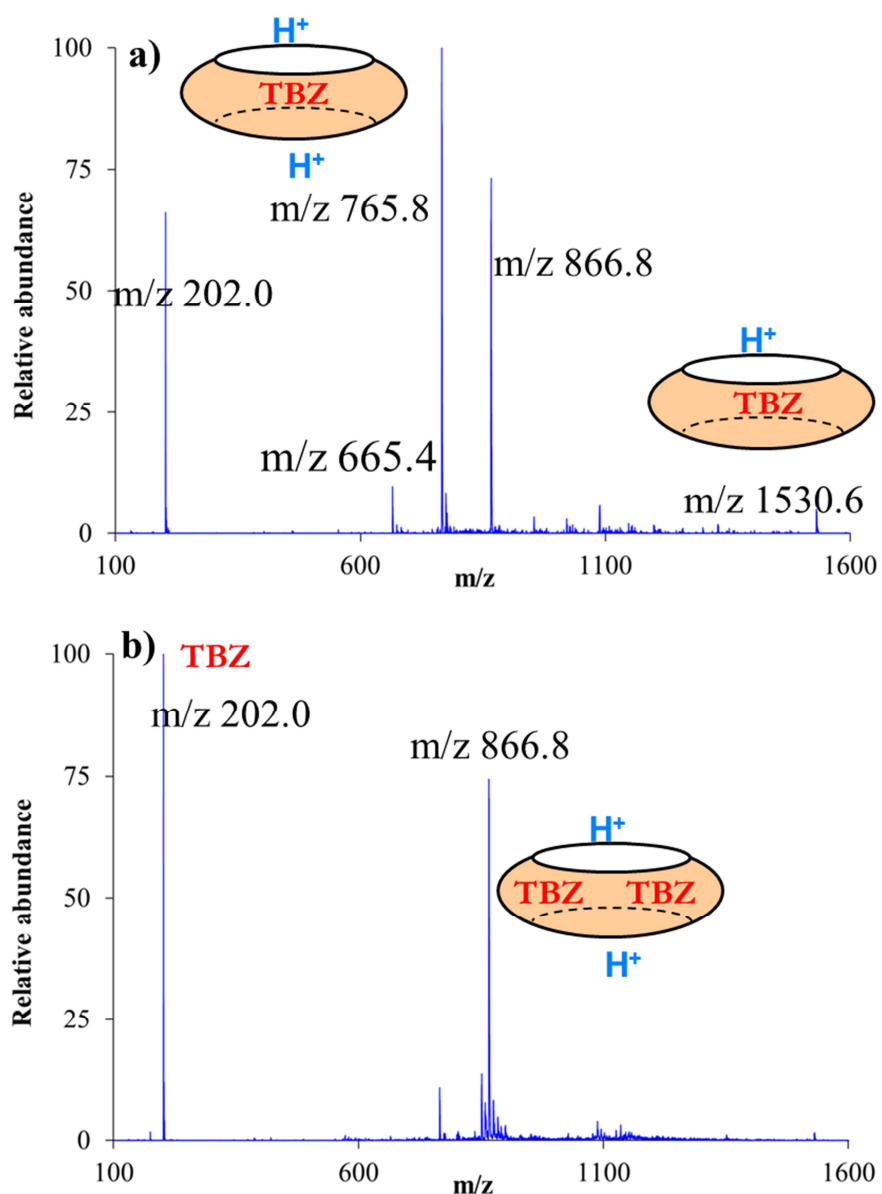

Figure S3. ESI-MS spectra (full scans) of aqueous solutions of TBZ and CB8 (1:1, stoichiometry) at pH ~ 6.5 **(a)** (30  $\mu$ M) and pH 1.2 **(b)** (30  $\mu$ M). Assignments:  $m/z$  202.0  $[TBZ+H]^+$ ; 665.4  $[CB8+2H]^{2+}$ ; 765.8  $[CB8+TBZ+2H]^{2+}$ ; 866.8  $[CB8+2TBZ+2H]^{2+}$ ; 1530.6  $[CB8+TBZ+H]^{2+}$ .

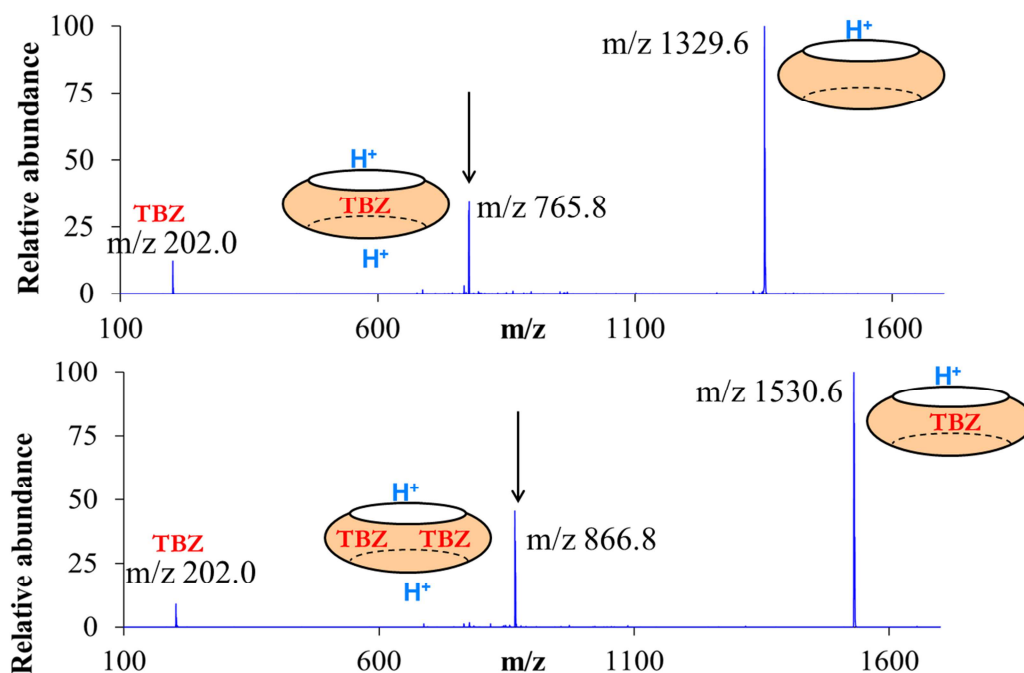

Figure S4. Fragmentation spectra ( $MS^2$ ) of the ions at  $m/z$  765.8 and 866.8. Assignments:  $m/z$  202.0  $[TBZ+H]^+$ ; 765.8  $[CB8+TBZ+2H]^{2+}$ ; 1329.6  $[CB8+H]^+$ , 866.8  $[CB8+2TBZ+2H]^{2+}$ ; 1530.6  $[CB8+TBZ+H]^+$ . The arrows indicate the fragmented peaks.

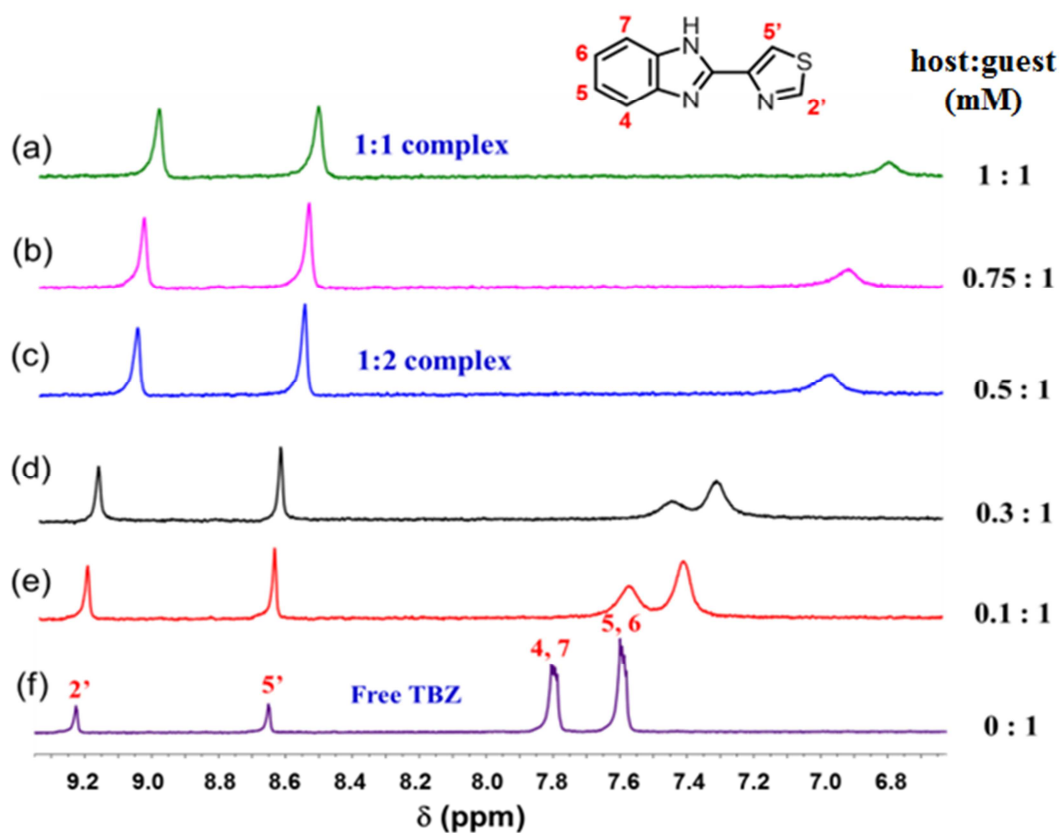

Figure S5. Partial  $^1H$  NMR spectra ( $D_2O$ ) of TBZ and TBZ-CB8 with different stoichiometries.  $[TBZ] = 1$  mM.  $pH = 1.2$ .

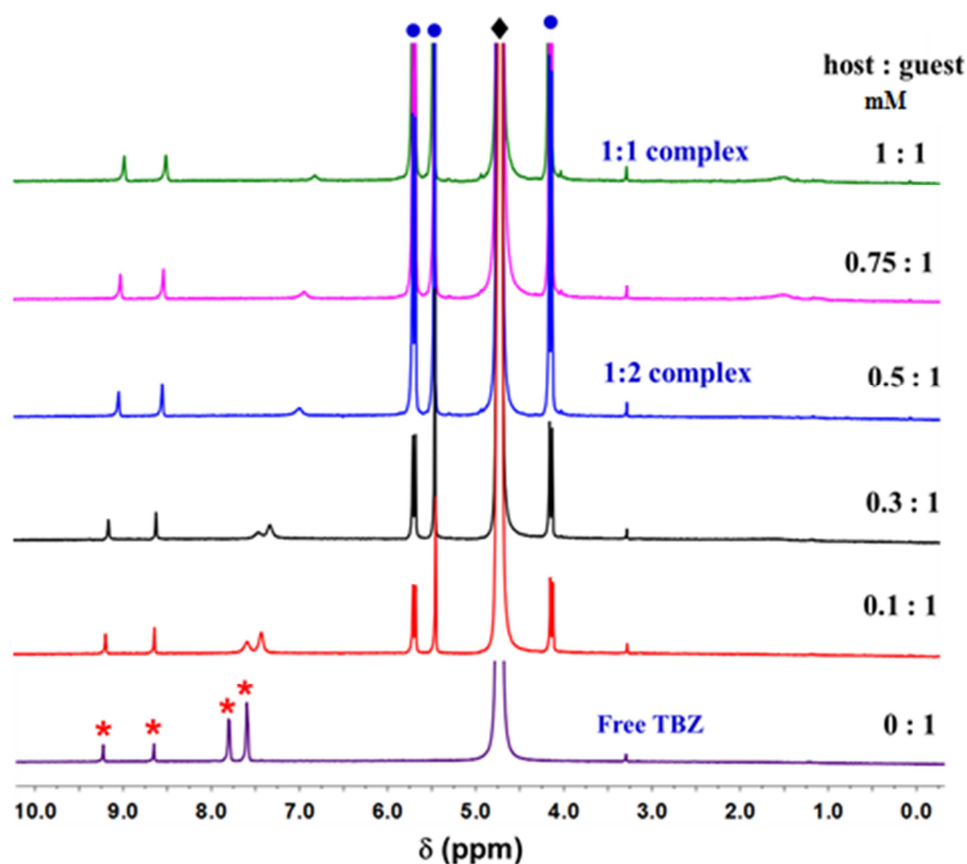

Figure S6. Full  $^1\text{H}$  NMR spectra (500 MHz,  $\text{D}_2\text{O}$ ) for the formations of 1:2 (Host: guest) and 1:1 (Host: guest) complexes for  $\text{TBZ@CB8}$ .  $[\text{TBZ}] = 1 \text{ mM}$ ,  $\text{pH}=1.2$ ; the solution became turbid after addition of CB8 to the complex beyond  $\text{TBZ} : \text{CB8} = 1:1$  ratio indicating the completion of the complex formation. “\*”, “•” and “◆” represent the guest, host and residual  $\text{H}_2\text{O}$  signal respectively.

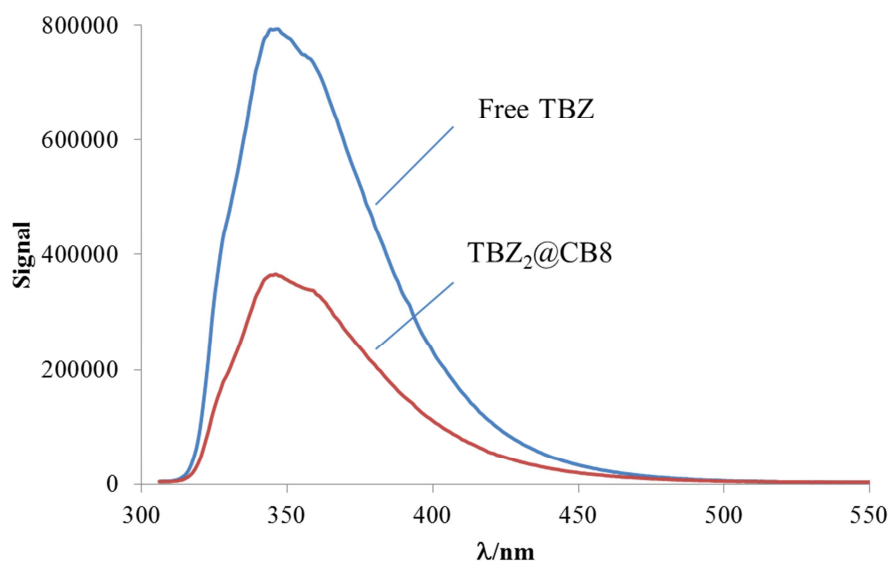

Figure S7. Steady state emission spectra of free TBZ and  $\text{TBZ}_2\text{@CB8}$  (500  $\mu\text{M}$ ) at pH 1.2.

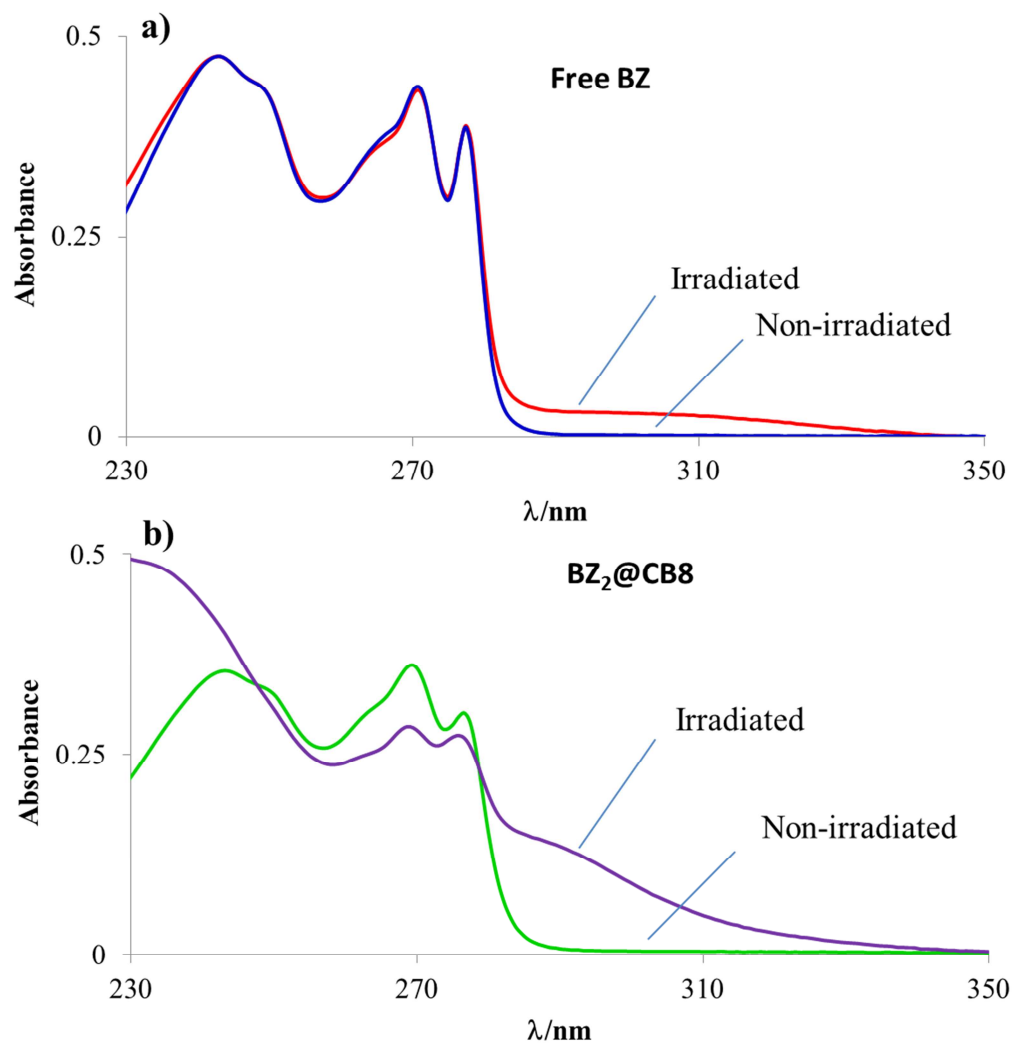

Figure S8. UV-Vis absorption spectra of BZ (a) and  $\text{BZ}_2\text{@CB8}$  (b), before and after irradiation. The concentrations were 100  $\mu\text{M}$  and 50  $\mu\text{M}$  for BZ and CB8, respectively.

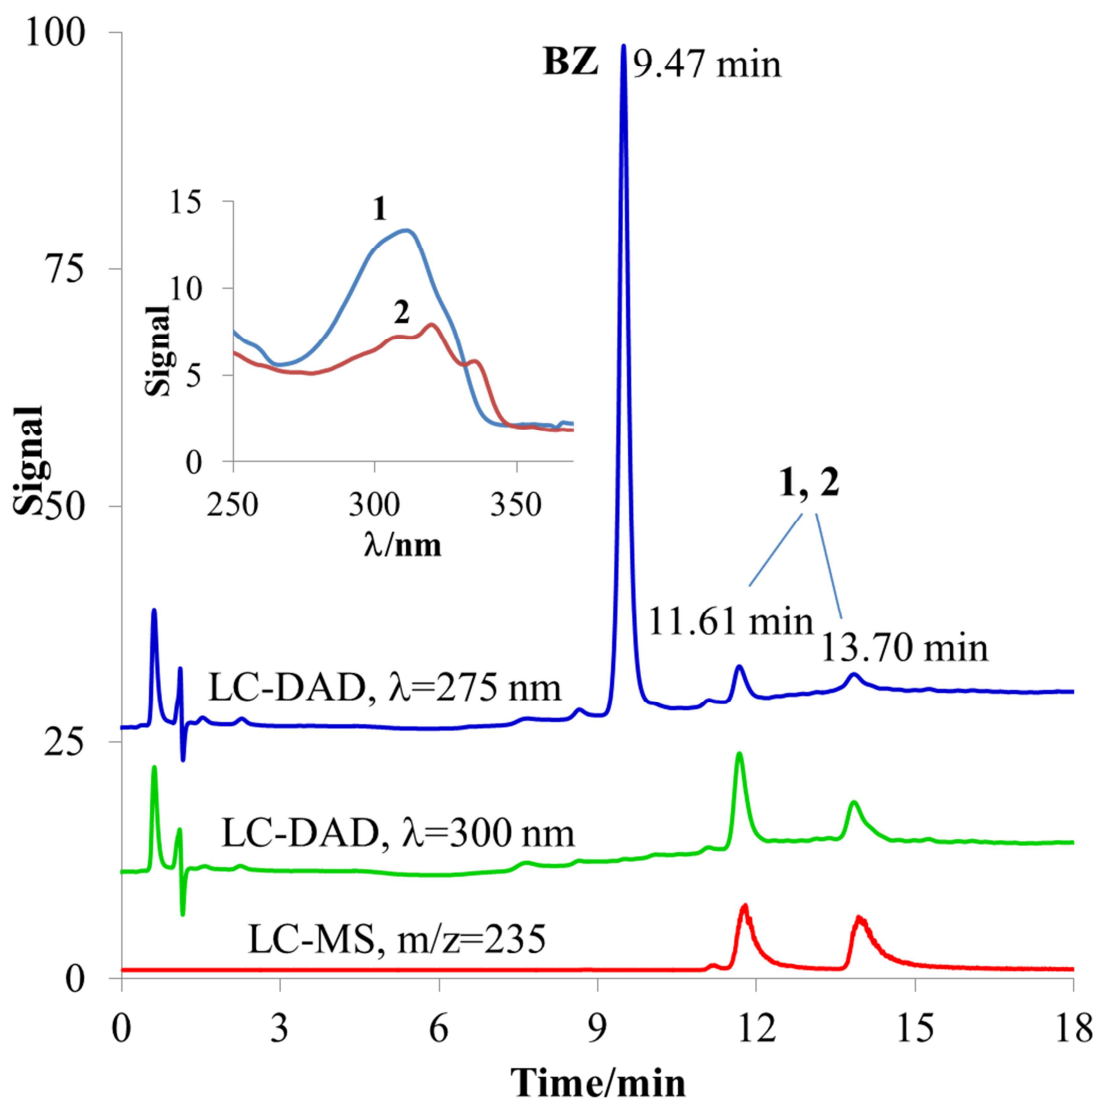

Figure S9. LC-DAD traces and LC-MS trace at  $m/z$  235 of an irradiated aqueous solution with free BZ (100  $\mu$ M) at pH 6.5. **1** and **2** are dehydrodimerization photoproducts. The inset shows the absorbance spectra of the photoproducts.

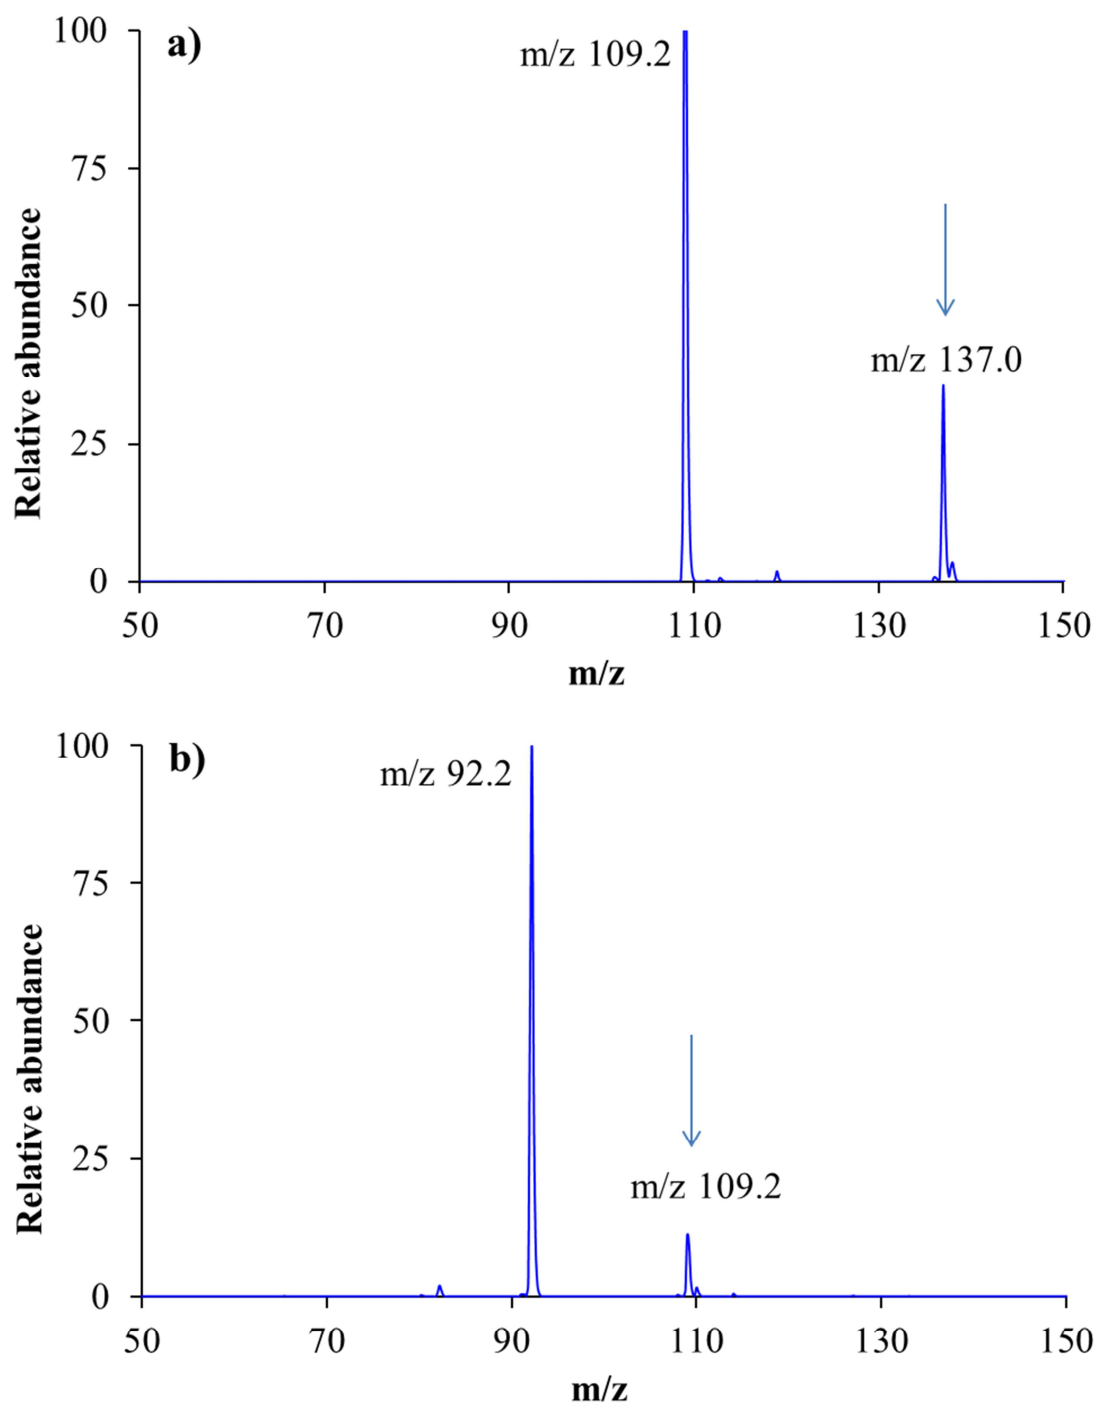

Figure S10. Fragmentation spectra of the ion at  $m/z$  137.0. **a)**  $MS^2(137.0)$ ; **b)**  $MS^3(137.0 \rightarrow 109.2)$ . The arrows indicate the fragmented peaks.



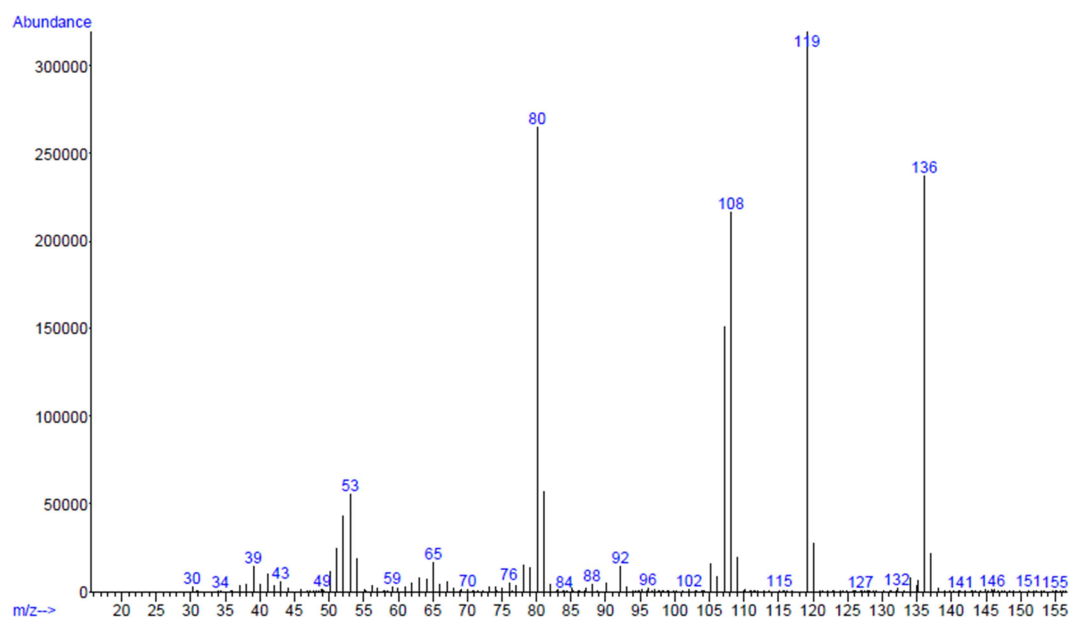

Figure S11. Mass spectrum (E.I.) of photoproduct of BZ<sub>2</sub>@CB<sub>8</sub>.

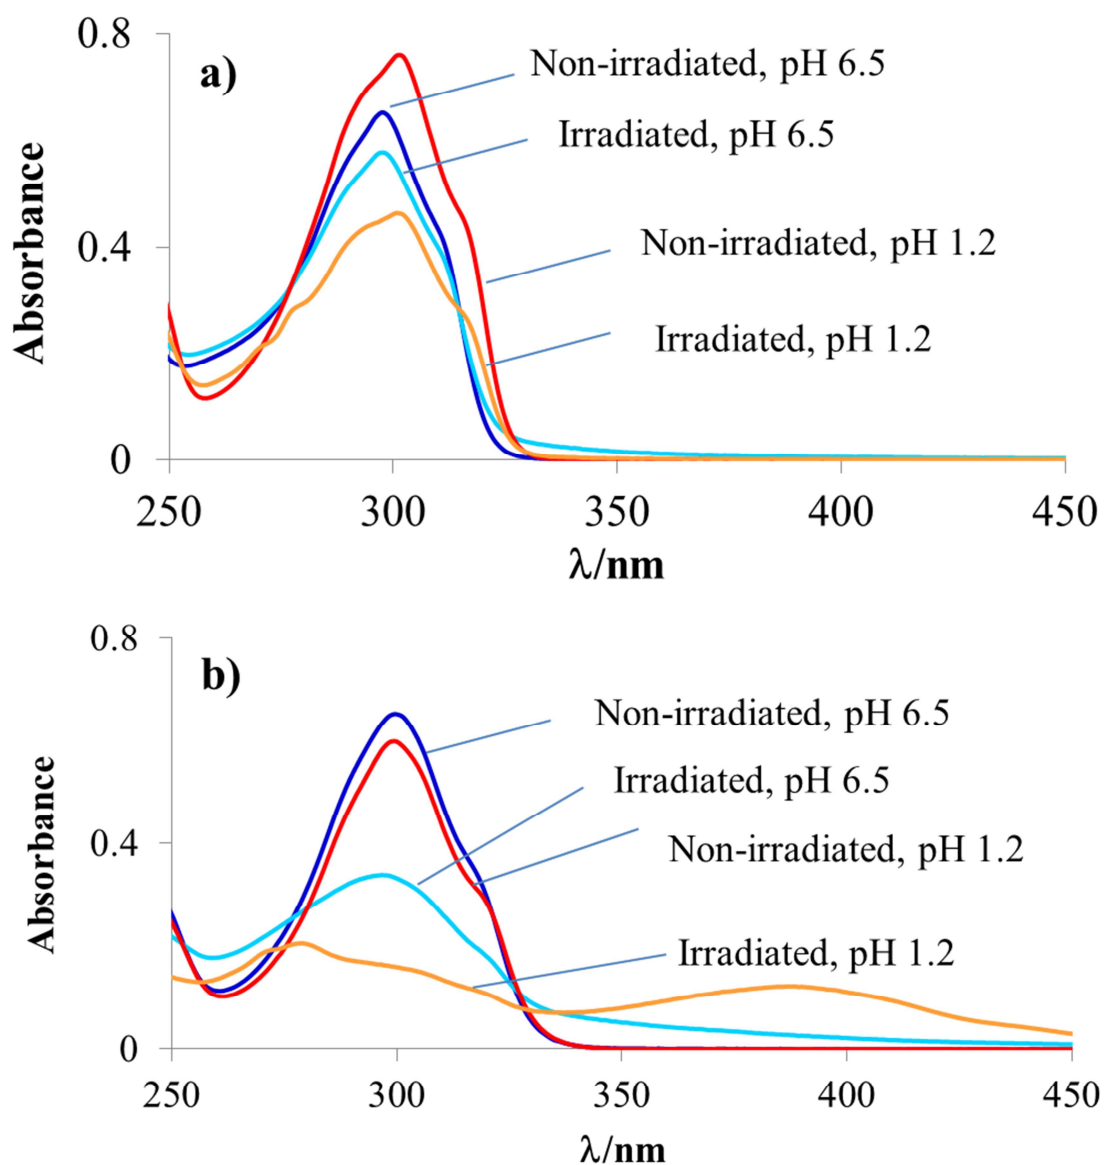

Figure S12. UV-Vis absorbance spectra of free TBZ, **a)**, and TBZ<sub>2</sub>@CB<sub>8</sub>, **b)**, ( $\sim 20 \mu\text{M}$ ), before and after irradiation, at pH 6.5 and 1.2.

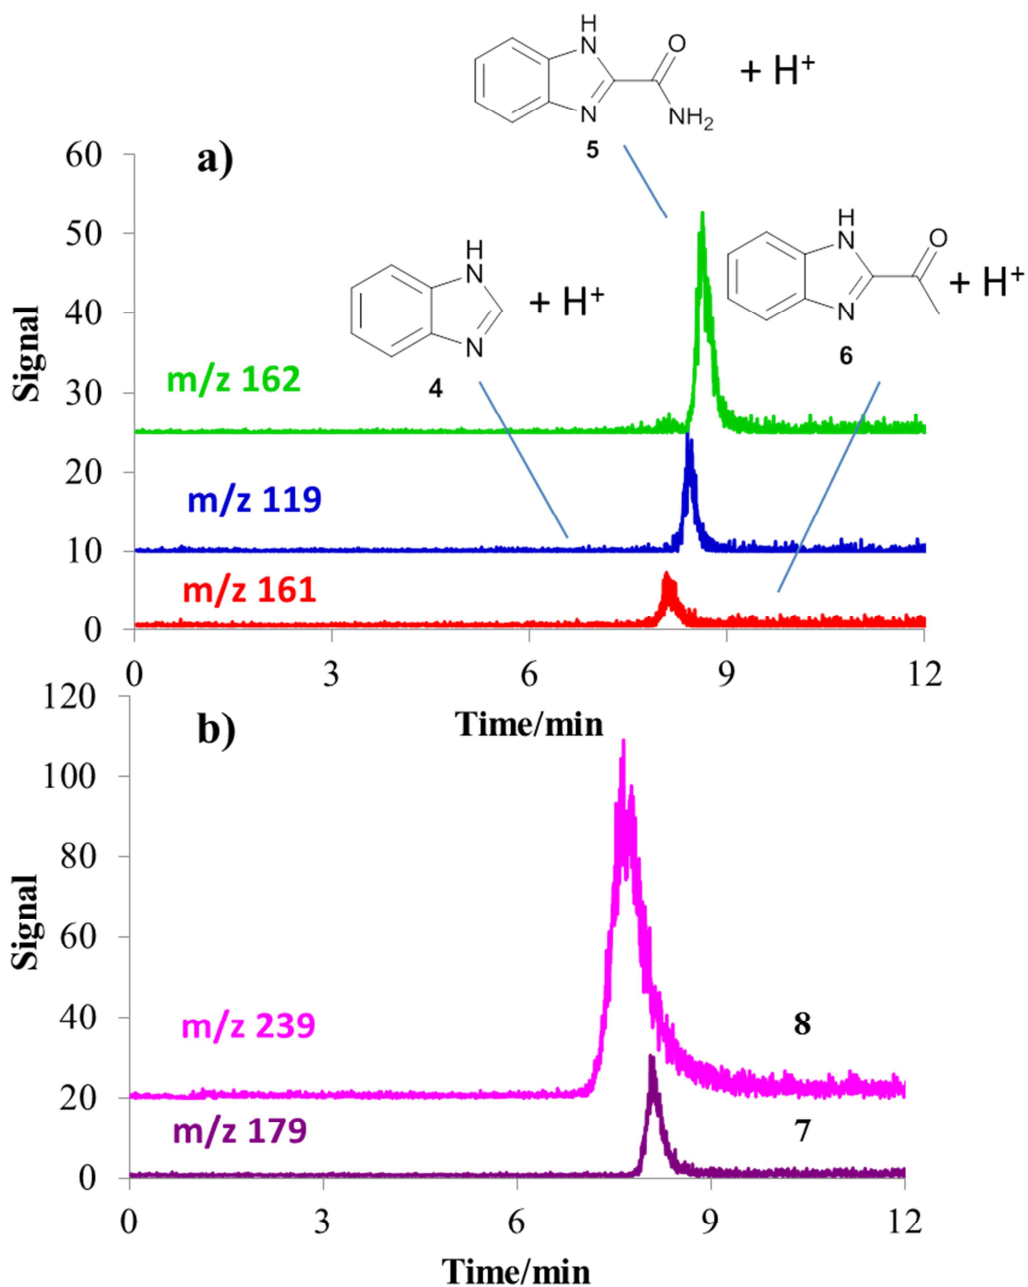

Figure S13. Single ion traces at  $m/z$  119, 161, 162, 179 and 239 for an irradiated sample of free TBZ in aqueous solution at pH 1.2. The insets show the structures of the identified compounds. **7** and **8** are non-identified compounds.

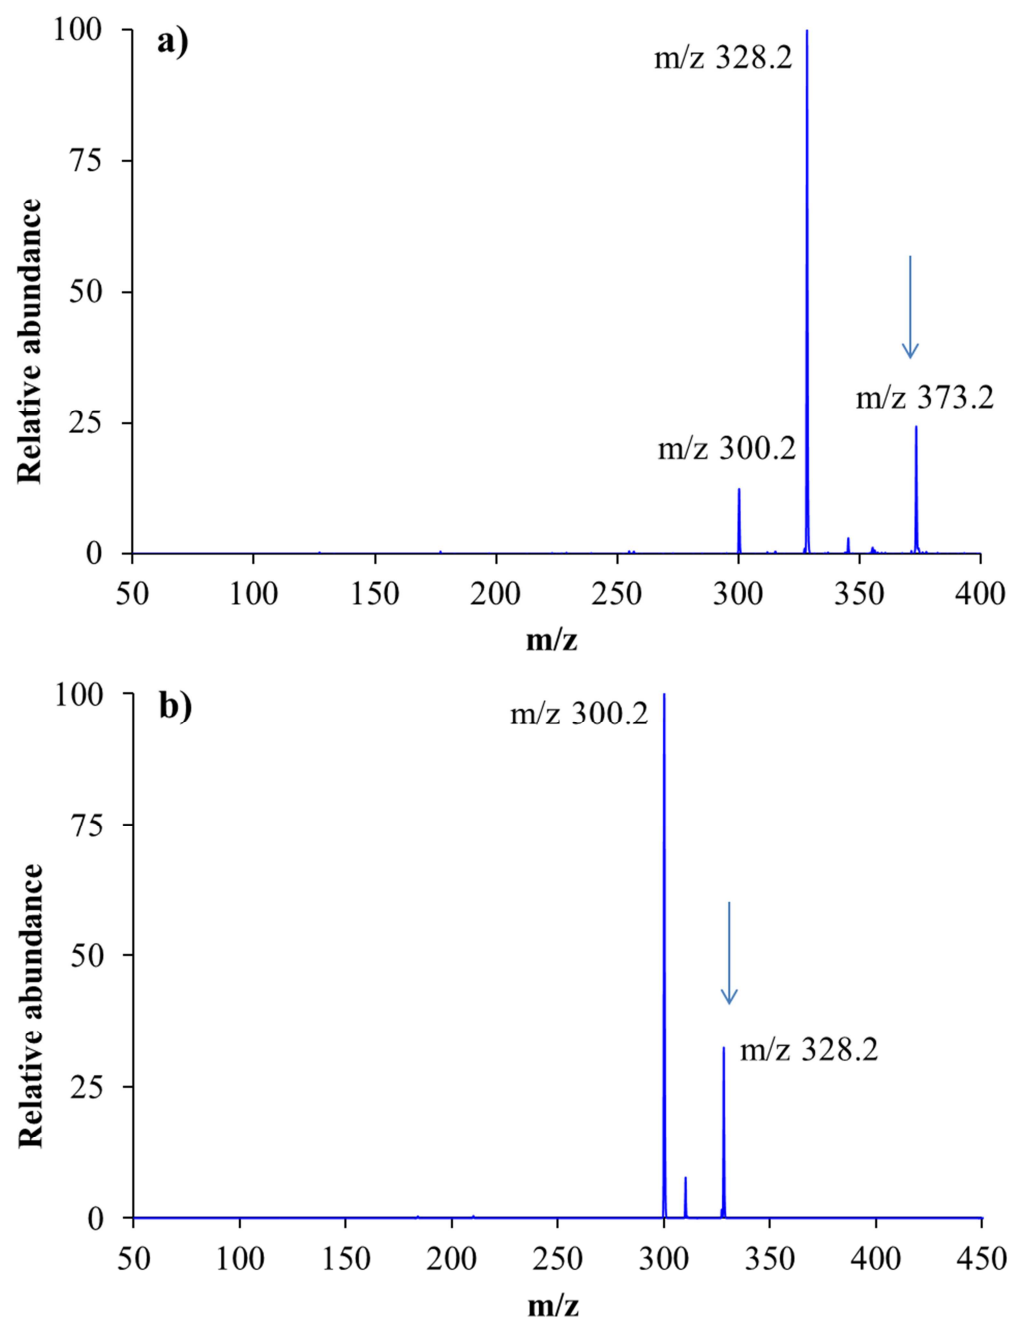

Figure S14. Fragmentation spectra of the ion at  $m/z$  373.2. a)  $MS^2(373.2)$ ; b)  $MS^3(373.2 \rightarrow 328.2)$ . The arrows indicate the fragmented peaks.

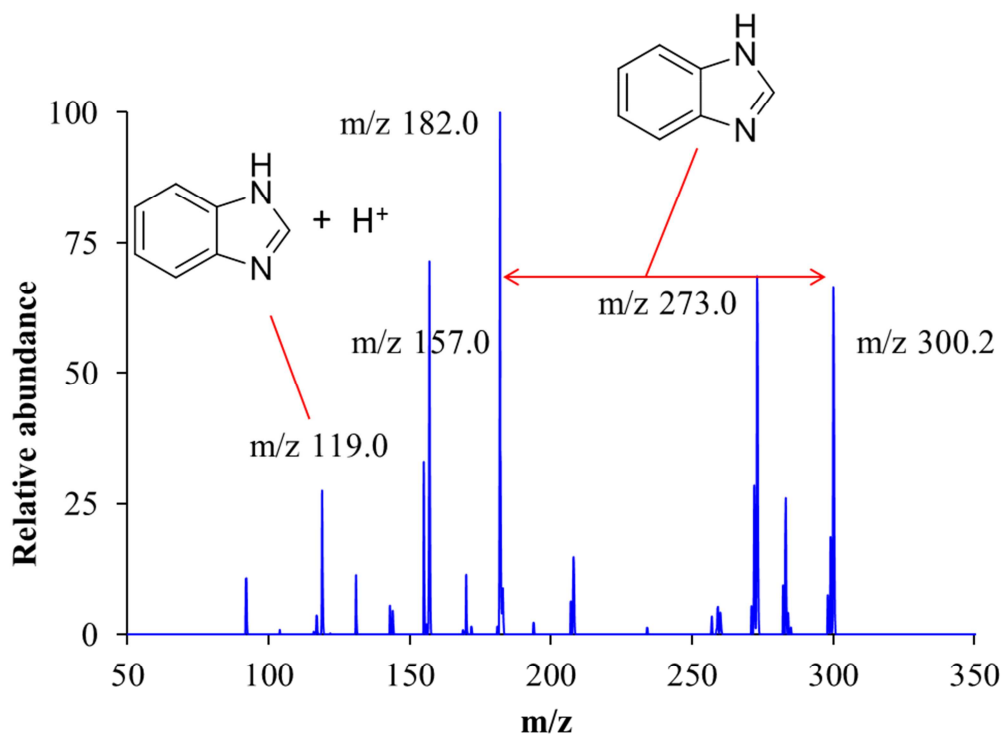

Figure S15. Fragmentation spectra of the ion at  $m/z$  373.2 ( $MS^4(373.2 \rightarrow 328.2 \rightarrow 300.2)$ ). The arrow indicates the fragmented peak. The insets show the structure of the ion at  $m/z$  119.0 and the neutral loss that gives  $m/z$  182.0

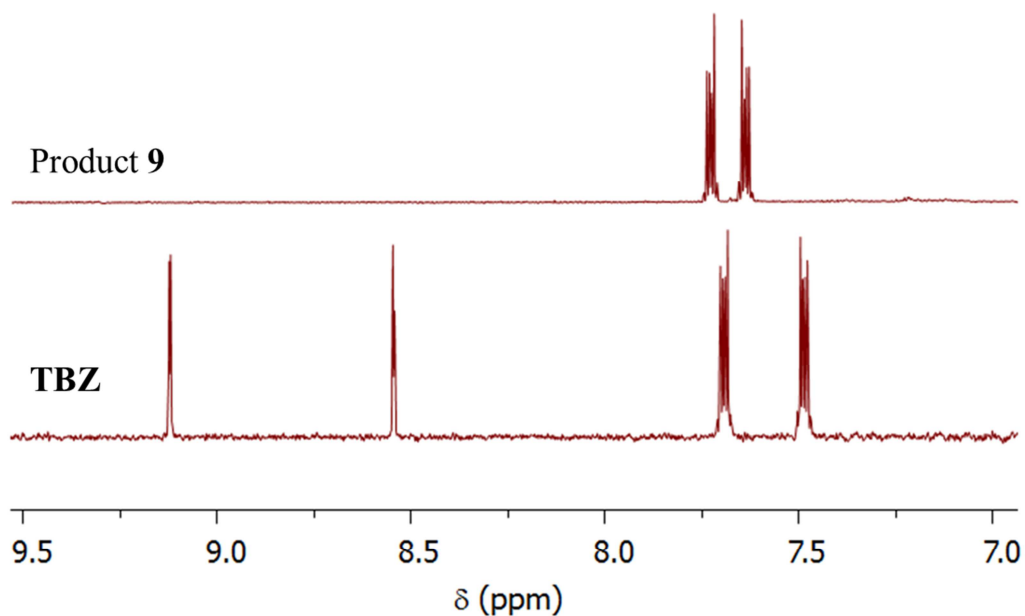

Figure S16. Detail of the  $^1H$  NMR spectra of TBZ and of photoproduct **9**.
